# Supplementary material for: Are cleaning activities a source of exposure to crystalline silica in women with rheumatoid arthritis? A case–control study
Source: PubMed Central journal article supplement — RMD Open. 2023 Aug 2;9(3):e003205. doi: 10.1136/rmdopen-2023-003205 (PMC10401212; doi:10.1136/rmdopen-2023-003205), 2023-08-02
Supplement: rmdopen-2023-003205supp001.pdf [file rmdopen-2023-003205supp001.pdf]

## SUPPLEMENTARY MATERIALS

[In Supplementary Text 1 & Text 2: Translation of DELCQ from French to English, by Seema Sarangi-Doutrelant]

### Supplementary Figure S1: ELIPSSilice 1 & 2 respondent samples

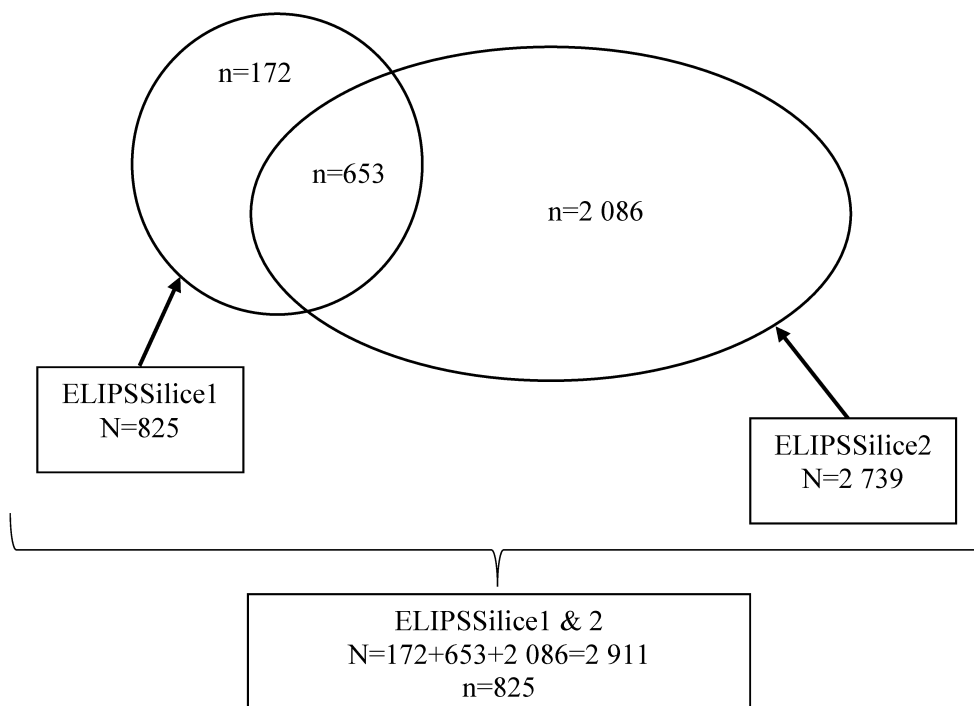

The ELIPSS panel is an experimental survey infrastructure conceived by the main French public organizations and research centers involved in statistical data production. Since 2013, it has been used to study the feasibility of self-administered questionnaires for people (initially aged 18-75 when recruited) in households. ELIPSS aims to: a) make statistical data collection more efficient, *i.e.* to reverse the historical decrease of the response rate in all surveys conducted in the general population, while keeping high methodological standards that meet the quality standards of public statistics; b) to facilitate social scientists' access to high-quality, nationally representative data (metropolitan France, excluding overseas territories) through use of a public device at reduced cost. The ELIPSS panel and infrastructure is accessible through calls for proposals. The SILICOSIS team (SILICOSIS Project, European Research Council Advanced Grant, led by Paul-André Rosental, Centre for European Studies and Comparative Policy, 2012-2017) had the opportunity to use the methodological support and data collection tools of ELIPSS twice, via two successive

calls for proposals, while the number of ELIPSS panelists was growing. The two successive surveys were entitled ELIPSSilice1 and ELIPSSilice2, given the survey's focus on exposure to crystalline silica ("silice" in French).

**Supplementary Data S1: two extracts from DELCQ, questioning scheme n°1 about occupational and non-occupational settings**

The type of questioning scheme presented here began with a screening question to explore an occupation *potentially at risk of exposure to SiO<sub>2</sub>*. A positive answer to this first screening question yielded one or more subsequent questions aiming to assess whether the respondent had been involved in *specific exposure activities in this setting*. If so, respondents also had to evaluate the cumulative duration of exposure in their life (<1 year; [1;5[ years; >= 5 years) and the level of dust protection (mainly respiratory but also cutaneous and ophthalmological) they had used (from (i) never protected or protection always ineffective; to iii) always effectively protected).

***In the occupational exposure module***

**EXPRO 1 - ... IN THE BUILDING AND CONSTRUCTION SECTOR AND PUBLIC WORKS?**

1) Yes

2) No

If EXPRO 1=2, go to EXPRO7

If EXPRO 1=1

|                                                                                                | If YES, how many years?                                                 | Were you equipped with a dust protection device (e.g. mask, local exhaust ventilation) or a dust control system limiting exposure to dust?                                   |
|------------------------------------------------------------------------------------------------|-------------------------------------------------------------------------|------------------------------------------------------------------------------------------------------------------------------------------------------------------------------|
| <b>EXPRO 2 – Performing demolition work with or without explosives?</b><br><br>1) Yes<br>2) No | 1) Less than 1 year<br>2) Between 1 and 5 years<br>3) More than 5 years | 1) Never used any protection, or used ineffective protection<br>2) Sometimes used protection, or used moderately effective protection<br>3) Always used effective protection |

|                                                                                                                                                                                           |                                                                                  |                                                                                                                                                                                       |
|-------------------------------------------------------------------------------------------------------------------------------------------------------------------------------------------|----------------------------------------------------------------------------------|---------------------------------------------------------------------------------------------------------------------------------------------------------------------------------------|
| <p><b>EXPRO 3 – Boring or building tunnels or motorways, performing excavation works, carrying out clearing operations?</b></p> <p>1) Yes<br/>2) No</p>                                   | <p>1) Less than 1 year<br/>2) Between 1 and 5 years<br/>3) More than 5 years</p> | <p>1) Never used any protection, or used ineffective protection<br/>2) Sometimes used protection, or used moderately effective protection<br/>3) Always used effective protection</p> |
| <p><b>EXPRO 4 – Masonry or working with plaster?</b></p> <p>1) Yes<br/>2) No</p>                                                                                                          | <p>1) Less than 1 year<br/>2) Between 1 and 5 years<br/>3) More than 5 years</p> | <p>1) Never used any protection, or used ineffective protection<br/>2) Sometimes used protection, or used moderately effective protection<br/>3) Always used effective protection</p> |
| <p><b>EXPRO 5 – Working with concrete: mixing, operating on dry concrete, cutting concrete with a circular saw, drilling, wall and floor polishing, etc.?</b></p> <p>1) Yes<br/>2) No</p> | <p>1) Less than 1 year<br/>2) Between 1 and 5 years<br/>3) More than 5 years</p> | <p>1) Never used any protection, or used ineffective protection<br/>2) Sometimes used protection, or used moderately effective protection<br/>3) Always used effective protection</p> |
| <p><b>EXPRO 6 – Performing maintenance on construction sites: sweeping, mopping, removing dust...?</b></p> <p>1) Yes<br/>2) No</p>                                                        | <p>1) Less than 1 year<br/>2) Between 1 and 5 years<br/>3) More than 5 years</p> | <p>1) Never used any protection, or used ineffective protection<br/>2) Sometimes used protection, or used moderately effective protection<br/>3) Always used effective protection</p> |

***In the non-occupational exposure module***

**EXPEP 1 – ... Do you or have you REGULARLY engaged, at certain periods of your life, in DIY?**

- 1) Yes  
2) No

If EXPEP 1=2, go to EXPEP 3

If EXPEP 1=1

|  |                                           |                                                                                                                                                          |
|--|-------------------------------------------|----------------------------------------------------------------------------------------------------------------------------------------------------------|
|  | <p><b>If YES, for how many years?</b></p> | <p><b>Were you equipped with a dust protection device (e.g. mask, local exhaust ventilation) or a dust control system limiting exposure to dust?</b></p> |
|--|-------------------------------------------|----------------------------------------------------------------------------------------------------------------------------------------------------------|

|                                                                                                                                                                                                                                                                                                                                                                           |                                                                                  |                                                                                                                                                                                       |
|---------------------------------------------------------------------------------------------------------------------------------------------------------------------------------------------------------------------------------------------------------------------------------------------------------------------------------------------------------------------------|----------------------------------------------------------------------------------|---------------------------------------------------------------------------------------------------------------------------------------------------------------------------------------|
| <p><b>EXPEP 2 – During these DIY activities, were you exposed to...</b></p> <p>- ... <b>abrasive products</b> (sandblast, abrasive paper, etc.),</p> <p>- <b>mineral, wood or metal particles, or inorganic airborne particles</b> (e.g. resins, polymers)...</p> <p><b>during cutting, polishing, sanding, filing or welding operations?</b></p> <p>1) Yes<br/>2) No</p> | <p>1) Less than 1 year<br/>2) Between 1 and 5 years<br/>3) More than 5 years</p> | <p>1) Never used any protection, or used ineffective protection<br/>2) Sometimes used protection, or used moderately effective protection<br/>3) Always used effective protection</p> |
|---------------------------------------------------------------------------------------------------------------------------------------------------------------------------------------------------------------------------------------------------------------------------------------------------------------------------------------------------------------------------|----------------------------------------------------------------------------------|---------------------------------------------------------------------------------------------------------------------------------------------------------------------------------------|

=> go to EXPEP5

**EXPEP 3 – You do not engage in any DIY or do not engage in DIY regularly. However, have you occasionally undertaken significant DIY work such as construction, room renovation, floor laying, floor sanding, etc.?**

- 1) Yes  
2) No

If EXPEP 3= 2, go to EXPEP5

If EXPEP 3=1

|                                                                                                                                                             |                                                                         |                                                                                                                                                                              |
|-------------------------------------------------------------------------------------------------------------------------------------------------------------|-------------------------------------------------------------------------|------------------------------------------------------------------------------------------------------------------------------------------------------------------------------|
|                                                                                                                                                             | <b>If YES, for how many years?</b>                                      | <b>Were you equipped with a dust protection device (e.g. mask, local exhaust ventilation) or a dust control system limiting exposure to dust?</b>                            |
| <b>EXPEP 4 – During these occasional DIY activities, was your EXPOSURE TO AIRBORNE MINERAL, WOOD OR METAL PARTICLES SIGNIFICANT?</b><br><br>1) Yes<br>2) No | 1) Less than 1 year<br>2) Between 1 and 5 years<br>3) More than 5 years | 1) Never used any protection, or used ineffective protection<br>2) Sometimes used protection, or used moderately effective protection<br>3) Always used effective protection |

**Supplementary Data S2: two extracts from DELCQ, questioning scheme n°2 about occupational and non-occupational settings**

The type of questioning scheme presented here *directly began with a question about a task or activity known to expose people to SiO<sub>2</sub>*. If answered in the affirmative, respondents were subsequently asked to evaluate the cumulative duration of exposure in their life (<1 year; [1;5[ years; >= 5 years) and the level of dust protection (mainly respiratory but also cutaneous, ophthalmological) they had used (from (i) never protected or protection always ineffective; to iii) always effectively protected).

**In the occupational exposure module**

|                                                                                                                                                                   |                                                                         |                                                                                                                                                                              |
|-------------------------------------------------------------------------------------------------------------------------------------------------------------------|-------------------------------------------------------------------------|------------------------------------------------------------------------------------------------------------------------------------------------------------------------------|
|                                                                                                                                                                   | <b>If YES, for how many years?</b>                                      | <b>Were you equipped with a dust protection device (e.g. mask, local exhaust ventilation) or a dust control system limiting exposure to dust?</b>                            |
| <b>EXPRO 7 - ... Have you blasted abrasive materials or carried out sandblasting or paint stripping on buildings or metallic surfaces?</b><br><br>1) Yes<br>2) No | 1) Less than 1 year<br>2) Between 1 and 5 years<br>3) More than 5 years | 1) Never used any protection, or used ineffective protection<br>2) Sometimes used protection, or used moderately effective protection<br>3) Always used effective protection |

|                                                                                                                | If YES, for how many years?                                             | Were you equipped with a dust protection device (e.g. mask, local exhaust ventilation) or a dust control system limiting exposure to dust?                                   |
|----------------------------------------------------------------------------------------------------------------|-------------------------------------------------------------------------|------------------------------------------------------------------------------------------------------------------------------------------------------------------------------|
| <b>EXPRO 8 – Have you ever sandblasted other kinds of materials such as textile...?</b><br><br>1) Yes<br>2) No | 1) Less than 1 year<br>2) Between 1 and 5 years<br>3) More than 5 years | 1) Never used any protection, or used ineffective protection<br>2) Sometimes used protection, or used moderately effective protection<br>3) Always used effective protection |

***In the non-occupational exposure module***

|                                                                                                                                                             | If YES, for how many years?                                             | Were you equipped with a dust protection device (e.g. mask, local exhaust ventilation) or a dust control system limiting exposure to dust?                                   |
|-------------------------------------------------------------------------------------------------------------------------------------------------------------|-------------------------------------------------------------------------|------------------------------------------------------------------------------------------------------------------------------------------------------------------------------|
| <b><u>EXPEP 5 – Outside of your professional activities, have you ever FITTED MINERAL WOOL such as glass, rock or slag wool?</u></b><br><br>1) Yes<br>2) No | 1) Less than 1 year<br>2) Between 1 and 5 years<br>3) More than 5 years | 1) Never used any protection, or used ineffective protection<br>2) Sometimes used protection, or used moderately effective protection<br>3) Always used effective protection |

|                                                                                                                                                                                                                    | If YES, for how many years?                                             | Were you equipped with a dust protection device (e.g. mask, local exhaust ventilation) or a dust control system limiting exposure to dust?                                   |
|--------------------------------------------------------------------------------------------------------------------------------------------------------------------------------------------------------------------|-------------------------------------------------------------------------|------------------------------------------------------------------------------------------------------------------------------------------------------------------------------|
| <b><u>EXPEP 6 – ... Have you carried out HOUSEHOLD ACTIVITIES SUCH AS HOUSEWORK OR CLEANING THAT INVOLVED REGULAR USE OF ABRASIVE PRODUCTS (e.g. cleaning powder, scouring powder)?</u></b><br><br>1) Yes<br>2) No | 1) Less than 1 year<br>2) Between 1 and 5 years<br>3) More than 5 years | 1) Never used any protection, or used ineffective protection<br>2) Sometimes used protection, or used moderately effective protection<br>3) Always used effective protection |
